# Supplementary material
Source: PubMed Central journal article supplement (PMC3533139)
Supplement: NIHMS416641-supplement-01.pdf [file NIHMS416641-supplement-01.pdf]

| <b><u>eTable 1. Immunomodulatory treatment at baseline of MS patients demonstrating MME and not demonstrating MME during the study</u></b> |                                                                  |                                                                          |                |                                |
|--------------------------------------------------------------------------------------------------------------------------------------------|------------------------------------------------------------------|--------------------------------------------------------------------------|----------------|--------------------------------|
|                                                                                                                                            | <b>MS Patients that demonstrated MME during the study (n=10)</b> | <b>MS patients that did not demonstrate MME during the study (n=151)</b> | <b>P-value</b> | <b>All MS patients (n=161)</b> |
| <b><u>Immunomodulatory treatment at baseline</u></b>                                                                                       |                                                                  |                                                                          |                |                                |
| Interferon beta, n(%)                                                                                                                      | 3 (30%)                                                          | 44 (29%)                                                                 | 0.70           | 47 (29%)                       |
| Glatiramer acetate, n(%)                                                                                                                   | 1 (10%)                                                          | 45 (30%)                                                                 |                | 46 (29%)                       |
| Natalizumab, n(%)                                                                                                                          | 3 (30%)                                                          | 31 (21%)                                                                 |                | 34 (21%)                       |
| Fingolimod, n(%)                                                                                                                           | 0 (0%)                                                           | 1 (0.7%)                                                                 |                | 1 (0.6%)                       |
| Untreated, n(%)                                                                                                                            | 3 (30%)                                                          | 30 (20%)                                                                 |                | 33 (20%)                       |

MS: multiple sclerosis; MME: microcystic macular edema

**eFigure 1: Dotplots of baseline INL thickness.**

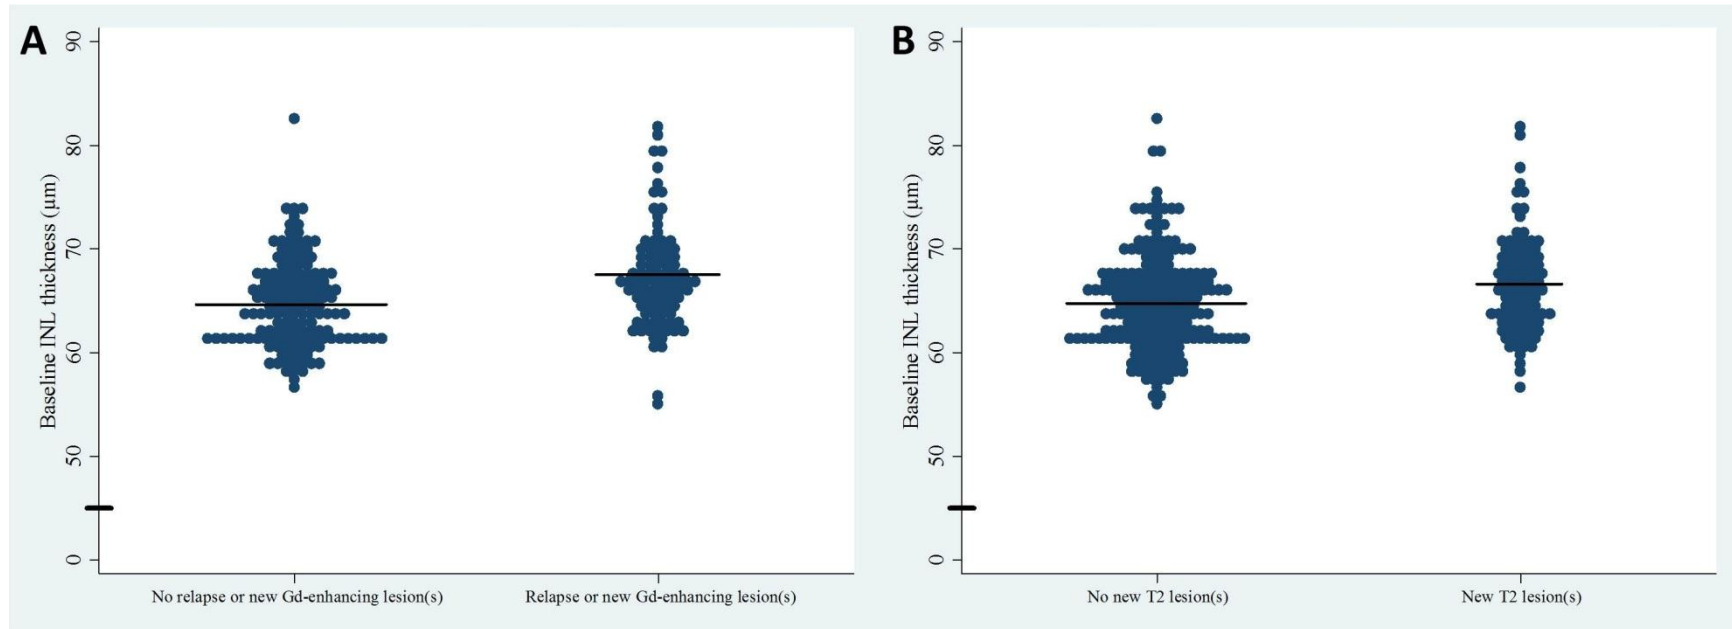

The same data is presented as box and whiskers plots in Figure 4.

Panel A shows baseline INL thicknesses of patients that developed relapses or new Gd-enhancing lesions during study follow-up (n= 47 subjects [94 eyes]) vs. patients that did not (n=73 subjects [146 eyes]). Panel B shows baseline INL thicknesses of MS patients exhibiting new T2 lesions during follow-up (n=49 subjects [98 eyes]), as compared to patients that did not (n=109 subjects [218 eyes]).

The horizontal lines superimposed on the dotplots represent the corresponding mean INL thicknesses.

**eFigure 2: Receiving operator characteristic (ROC) curve of baseline INL thickness for the prediction of development of a relapse or new Gd-enhancing lesion during follow-up in RRMS.**

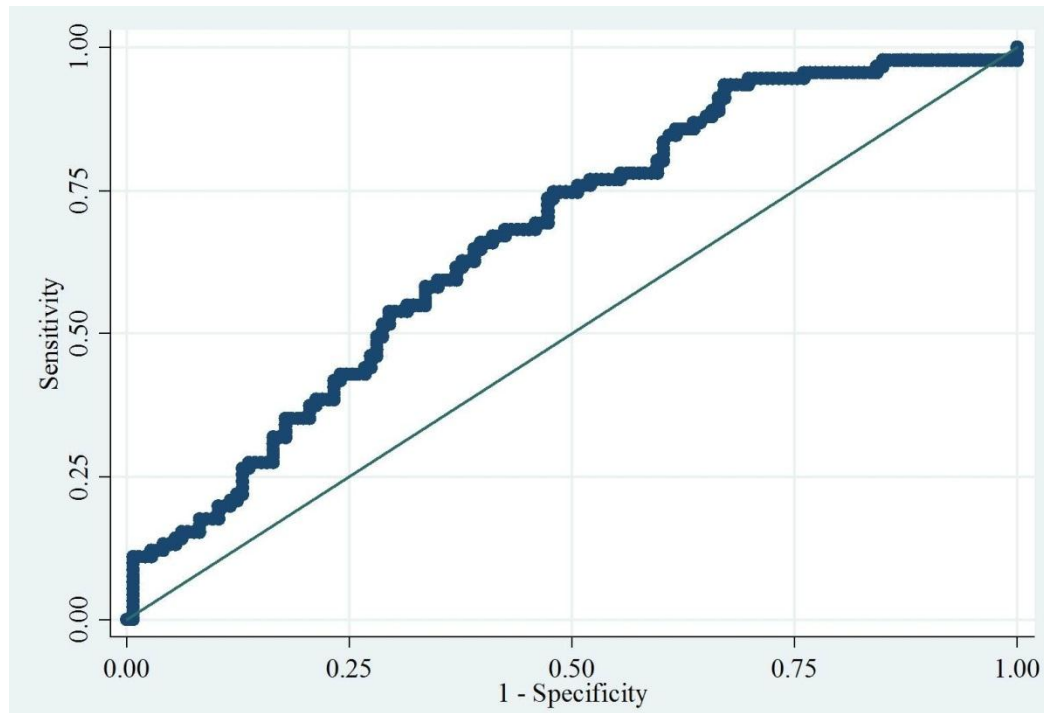

Data available for 120 RRMS patients (240 eyes). The area under the ROC curve (AUROC) is 0.67 (95% confidence intervals: 0.60-0.74).

**eFigure 3: Scatterplots of baseline INL thickness with disease duration and age in MS.**

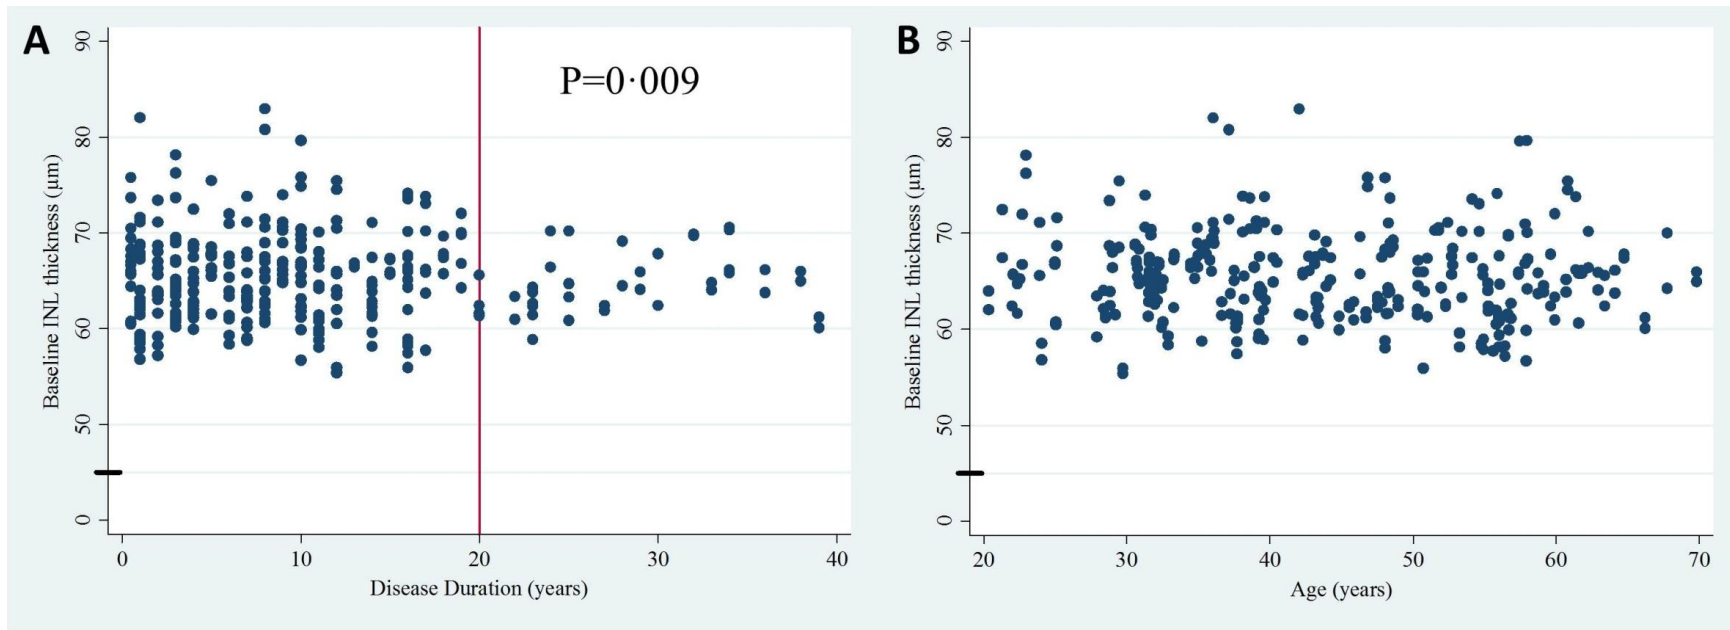

Panel A illustrates increased variance of INL thickness measures earlier in the course of MS. The p-value result is from Levene's variance ratio testing of baseline INL thickness in MS patients with disease duration <20 years vs. MS patients with disease duration  $\geq 20$  years. Panel B illustrates the lack of relationship between baseline INL thickness and age in MS.
